# Supplementary material for: In vitro DNA binding, molecular docking and antimicrobial studies on a newly synthesized poly(o-toluidine)–titanium dioxide nanocomposite
Source: Royal Society of Chemistry journal article supplement (doi:10.1039/c4ra05173d), 2014-08-20
Supplement: c4ra05173d1.pdf [file c4ra05173d1.pdf]

**Supplementary Information File**

**In-vitro DNA binding, molecular docking and antimicrobial studies on newly synthesized poly(*o*-toluidine)-titanium dioxide nanocomposite**

**Mohammad Shakir<sup>a</sup>, Mohd Shoeb Khan<sup>a</sup>, Saud Ibrahim Al-Resayes<sup>b</sup>, Umair Baig<sup>c</sup>, Parvez Alam<sup>d</sup>, Rizwan Hasan Khan<sup>d</sup>, Mahboob Alam<sup>e</sup>**

*<sup>a</sup>Department of Chemistry, Aligarh Muslim University, Aligarh 202002, India.*

*<sup>b</sup>Department of Chemistry, College of Science, King Saud University, Riyadh, Saudi Arabia.*

*<sup>c</sup> Faculty of Science, Department of Chemistry, Universiti Teknologi Malaysia, 81310 UTM Johor Bahru, Johor, Malaysia.*

*<sup>d</sup>Interdisciplinary Biotechnology unit, Aligarh Muslim University, Aligarh-202002 (UP) India.*

*<sup>e</sup>Division of Bioscience, Dongguk University, Gyeongju 780-714, Republic of Korea.*

*Author for Correspondence: [shakir078@yahoo.com](mailto:shakir078@yahoo.com)  
Phone No. +91-9837430035*

**Table S1.** Details of preparation of POT and POT-TiO<sub>2</sub> nanocomposite.

| Sample ID             | Volume of stock solution A taken (mL) | Volume of stock solution B taken (mL) | Weight of TiO <sub>2</sub> nanoparticles taken in 200 mL of 1M HCl (g) | Ratio of <i>o</i> -toluidine monomer and TiO <sub>2</sub> |
|-----------------------|---------------------------------------|---------------------------------------|------------------------------------------------------------------------|-----------------------------------------------------------|
| POT                   | 100                                   | 100                                   | 0.0 g                                                                  | 1:0                                                       |
| POT- TiO <sub>2</sub> | 100                                   | 100                                   | 0.20 g                                                                 | 1:1                                                       |

Stock solution A: 200 g of double distilled *o*-toluidine in 1000 mL of 1M HCl.

Stock solution B: 72.5 g of K<sub>2</sub>S<sub>2</sub>O<sub>8</sub> in 1000 mL of 1M HCl.

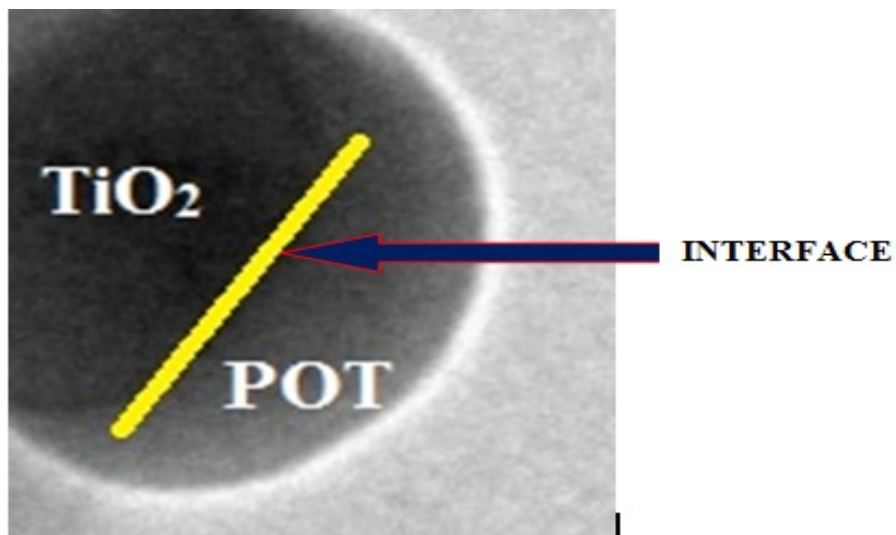

**Fig. S2:** The TEM micrograph represents the formation of PCz-TiO<sub>2</sub> nanocomposite and also showing the polymerization of carbazole on the surface of TiO<sub>2</sub> nanoparticles.
